# Supplementary material for: Mapping the Proteome of the Synaptic Cleft through Proximity Labeling Reveals New Cleft Proteins
Source: MDPI journal article supplement (doi:10.3390/proteomes6040048), 2018-11-28
Supplement: s1 [file s1]

## Supplementary Materials

**Table S1.** Synaptic cleft candidates identified by proximity labeling with SynCAM 1-HRP.

| Protein                                                             | Gene     | Repl. | Molecular Class                                            | Enrichment | Specific |
|---------------------------------------------------------------------|----------|-------|------------------------------------------------------------|------------|----------|
| D166 antigen                                                        | Alcam    | 4     | Adhesion molecule                                          | 2.65       | 3        |
| Coxsackievirus and adenovirus receptor homolog                      | Cxadr    | 4     | Cell surface receptor                                      | 2.95       | 1        |
| Cadherin-2/N-cadherin                                               | Cdh2     | 4     | Adhesion molecule                                          | 2.10       | 1        |
| Neurofascin                                                         | Nfasc    | 4     | Adhesion molecule                                          | 1.84       | 1        |
| Opioid-binding protein/cell adhesion molecule                       | Opcml    | 4     | Adhesion molecule                                          | 1.68       | 1        |
| Adhesion G protein-coupled receptor L3/Latrophilin 3                | Adgrl3   | 4     | Unclassified                                               | 1.50       | 1        |
| Neural cell adhesion molecule L1                                    | L1cam    | 4     | Adhesion molecule                                          | 2.05       | 0        |
| Neural cell adhesion molecule 1                                     | Ncam1    | 4     | Adhesion molecule                                          | 1.45       | 0        |
| Contactin-1                                                         | Cntn1    | 4     | Adhesion molecule                                          | 1.40       | 0        |
| Neuronal growth regulator 1                                         | Negr1    | 4     | Unclassified                                               | 1.10       | 0        |
| Neogenin (Fragment)                                                 | Neo1     | 3     | Cell surface receptor                                      | N.A.       | 3        |
| Tyrosine-protein phosphatase non-receptor type substrate 1          | Sirpa    | 3     | Cell surface receptor                                      | N.A.       | 3        |
| Contactin-5                                                         | Cntn5    | 3     | Unclassified                                               | N.A.       | 3        |
| Adhesion G protein-coupled receptor L1                              | Adgrl1   | 3     | G protein coupled receptor                                 | 2.89       | 2        |
| SynCAM 3/Cell adhesion molecule 3                                   | Cadm3    | 3     | Immunoglobulin                                             | 2.79       | 2        |
| Voltage-dependent calcium channel subunit alpha-2/delta-1           | Cacna2d1 | 3     | Voltage gated channel                                      | 1.82       | 2        |
| Neurexin-3                                                          | Nrxn3    | 3     | Adhesion molecule                                          | 1.00       | 2        |
| Cadherin-4 (Fragment)                                               | Cdh4     | 3     | Adhesion molecule                                          | 2.26       | 1        |
| Neurologin-2                                                        | Nlgn2    | 3     | Integral membrane protein: Cell adhesion molecule activity | 1.62       | 1        |
| Noelin                                                              | Olfm1    | 3     | Unclassified                                               | 1.04       | 1        |
| Neuronal cell adhesion molecule                                     | Nrcam    | 3     | Adhesion molecule                                          | 2.23       | 0        |
| Receptor-type tyrosine-protein phosphatase zeta                     | Ptprz1   | 3     | Receptor tyrosine phosphatase                              | 1.21       | 0        |
| Neurexin-1                                                          | Nrxn1    | 3     | Cell surface receptor                                      | 0.84       | 0        |
| Leucine-rich repeat-containing protein 4B                           | Lrrc4b   | 2     | Unclassified                                               | N.A.       | 2        |
| Probable G-protein coupled receptor 158                             | Gpr158   | 2     | G protein coupled receptor                                 | N.A.       | 2        |
| MAM domain-containing glycosylphosphatidylinositol anchor protein 2 | Mdga2    | 2     | Unclassified                                               | N.A.       | 2        |
| Gamma-enolase                                                       | Eno2     | 2     | Enzyme: Hydratase                                          | N.A.       | 2        |
| Dipeptidyl aminopeptidase-like protein 6                            | Dpp6     | 2     | Membrane transport protein                                 | N.A.       | 2        |
| Contactin-associated protein 1                                      | Cntnap1  | 2     | Cell surface receptor                                      | 3.34       | 1        |

|                                                                   |          |   |                                                            |      |   |
|-------------------------------------------------------------------|----------|---|------------------------------------------------------------|------|---|
| Neuroigin-3                                                       | Nlgn3    | 2 | Integral membrane protein: Cell adhesion molecule activity | 1.86 | 1 |
| Tenascin-R                                                        | Tnr      | 2 | Extracellular matrix protein                               | 2.39 | 1 |
| OX-2 membrane glycoprotein                                        | Cd200    | 2 | Unclassified                                               | 0.44 | 1 |
| Receptor-type tyrosine-protein phosphatase S                      | Ptprs    | 2 | Receptor tyrosine phosphatase                              | 2.96 | 1 |
| Leucine-rich glioma-inactivated protein 1                         | Lgi1     | 2 | Unclassified                                               | 1.49 | 1 |
| Gamma-aminobutyric acid receptor subunit gamma-2                  | Gabrg2   | 2 | Extracellular ligand gated channel                         | 0.98 | 1 |
| Reticulon-4 receptor-like 2                                       | Rtn4rl2  | 2 | Cell surface receptor                                      | 2.15 | 0 |
| Sodium/potassium-transporting ATPase subunit beta-1               | Atp1b1   | 2 | ATPase                                                     | 0.81 | 0 |
| Neuroplastin                                                      | Nptn     | 2 | Immunoglobulin                                             | 1.81 | 0 |
| Hyaluronan and proteoglycan link protein 1                        | Hapln1   | 2 | Extracellular matrix protein                               | 0.86 | 0 |
| Excitatory amino acid transporter 2                               | Slc1a2   | 1 | Membrane transport protein                                 | 0.00 | 2 |
| Ciliary neurotrophic factor receptor subunit alpha                | Cntfr    | 1 | Cell surface receptor                                      | N.A. | 1 |
| SynCAM 2/Cell adhesion molecule 2                                 | Cadm2    | 1 | Adhesion molecule                                          | N.A. | 1 |
| BMP/retinoic acid-inducible neural-specific protein 2             | Brinp2   | 1 | Unclassified                                               | N.A. | 1 |
| Annexin A1                                                        | Anxa1    | 1 | Calcium binding protein                                    | N.A. | 1 |
| Neurexin-2                                                        | Nrxn2    | 1 | Cell surface receptor                                      | N.A. | 1 |
| Sodium-driven chloride bicarbonate exchanger                      | Slc4a10  | 1 | Membrane transport protein                                 | N.A. | 1 |
| Neuronal pentraxin receptor                                       | Nptxr    | 1 | Cell surface receptor                                      | N.A. | 1 |
| Plasminogen receptor (KT)                                         | Plgrkt   | 1 | Unclassified                                               | N.A. | 1 |
| Solute carrier family 12 member 5                                 | Slc12a5  | 1 | Membrane transport protein                                 | N.A. | 1 |
| Glutamate receptor ionotropic, NMDA 1                             | Grin1    | 1 | Ion channel                                                | N.A. | 1 |
| Solute carrier family 2, facilitated glucose transporter member 3 | Slc2a3   | 1 | Membrane transport protein                                 | N.A. | 1 |
| DOMON domain-containing protein FRRS1L                            | Frrs1l   | 1 | Integral membrane protein                                  | N.A. | 1 |
| Vesicular inhibitory amino acid transporter                       | Slc32a1  | 1 | Membrane transport protein                                 | N.A. | 1 |
| Neurotrimin                                                       | Ntm      | 1 | Adhesion molecule                                          | 3.76 | 0 |
| V-type proton ATPase subunit C 1                                  | Atp6v1c1 | 1 | ATPase                                                     | 2.01 | 0 |
| Amyloid-like protein 2                                            | Aplp2    | 1 | Integral membrane protein                                  | 1.41 | 0 |
| Cluster of Gamma-aminobutyric acid receptor subunit beta-3        | Gabrb3   | 1 | Extracellular ligand gated channel                         | 1.23 | 0 |
| Profilin-1                                                        | Pfn1     | 1 | Cytoskeletal associated protein                            | 3.50 | 0 |
| Serum albumin                                                     | Alb      | 1 | Transport/cargo protein                                    | 2.51 | 0 |

|                                                   |        |   |                                    |      |   |
|---------------------------------------------------|--------|---|------------------------------------|------|---|
| Coiled-coil domain-containing protein 80          | Ccdc80 | 1 | Unclassified                       | 0.81 | 0 |
| Leukocyte surface antigen CD47                    | Cd47   | 1 | Unclassified                       | 1.69 | 0 |
| Prohibitin                                        | Phb    | 1 | Adapter molecule                   | 0.53 | 0 |
| Excitatory amino acid transporter 1               | Slc1a3 | 1 | Transport/cargo protein            | 0.45 | 0 |
| Cluster of Glutamate receptor 2                   | Gria2  | 1 | Extracellular ligand gated channel | 1.14 | 0 |
| Sodium- and chloride-dependent GABA transporter 1 | Slc6a1 | 1 | Membrane transport protein         | 0.51 | 0 |

Protein and gene names of synaptic cleft candidates are indicated, together with their Molecular Class according to the Human Protein Reference Database (HPRD; [hdprg.org](http://hdprg.org)) and average synaptic cleft enrichment over plasma membrane where it passed Filter 1 and 2. Indicated is also how many biological replicates a protein was enriched (Replicates) and how often it was only detected in condition 5 ("Specific").

**Table S2.** Comparison of synaptic cleft candidates identified by proximity labeling with SynCAM 1-HRP with excitatory synaptic cleft parts list of [29] Proteins shown were solely enriched in this study.

| Protein                                                           | Gene     | Repl. | Molecular Class                 |
|-------------------------------------------------------------------|----------|-------|---------------------------------|
| CD166 antigen                                                     | Alcam    | 4     | Adhesion molecule               |
| Neurofascin                                                       | Nfasc    | 4     | Adhesion molecule               |
| Adhesion G protein-coupled receptor L3/Latrophilin-3              | Adgrl3   | 4     | N.A.                            |
| Neogenin (Fragment)                                               | Neo1     | 3     | Cell surface receptor           |
| Tyrosine-protein phosphatase non-receptor type substrate 1        | Sirpa    | 3     | Cell surface receptor           |
| Adhesion G protein-coupled receptor L1                            | Adgrl1   | 3     | G protein coupled receptor      |
| Receptor-type tyrosine-protein phosphatase zeta                   | Ptprz1   | 3     | Receptor tyrosine phosphatase   |
| Gamma-enolase                                                     | Eno2     | 2     | Enzyme: Hydratase               |
| Dipeptidyl aminopeptidase-like protein 6                          | Dpp6     | 2     | Membrane transport protein      |
| Tenascin-R                                                        | Tnr      | 2     | Extracellular matrix protein    |
| Leucine-rich glioma-inactivated protein 1                         | Lgi1     | 2     | Unclassified                    |
| Neuroplastin                                                      | Nptn     | 2     | Immunoglobulin                  |
| Excitatory amino acid transporter 2                               | Slc1a2   | 1     | Membrane transport protein      |
| Ciliary neurotrophic factor receptor subunit alpha                | Cntfr    | 1     | Cell surface receptor           |
| Cell adhesion molecule 2                                          | Cadm2    | 1     | Adhesion molecule               |
| Annexin A1                                                        | Anxa1    | 1     | Calcium binding protein         |
| Sodium-driven chloride bicarbonate exchanger                      | Slc4a10  | 1     | Membrane transport protein      |
| Plasminogen receptor (KT)                                         | Plgrkt   | 1     | N.A.                            |
| Solute carrier family 12 member 5                                 | Slc12a5  | 1     | Membrane transport protein      |
| Solute carrier family 2, facilitated glucose transporter member 3 | Slc2a3   | 1     | Membrane transport protein      |
| DOMON domain-containing protein FRRS1L                            | Frrs1l   | 1     | Integral membrane protein       |
| Vesicular inhibitory amino acid transporter                       | Slc32a1  | 1     | Membrane transport protein      |
| V-type proton ATPase subunit C 1                                  | Atp6v1c1 | 1     | ATPase                          |
| Amyloid-like protein 2                                            | Aplp2    | 1     | Integral membrane protein       |
| Profilin-1                                                        | Pfn1     | 1     | Cytoskeletal associated protein |
| Serum albumin                                                     | Alb      | 1     | Transport/cargo protein         |
| Coiled-coil domain-containing protein 80                          | Ccdc80   | 1     | Unclassified                    |
| Leukocyte surface antigen CD47                                    | Cd47     | 1     | Unclassified                    |
| Prohibitin                                                        | Phb      | 1     | Adapter molecule                |
| Excitatory amino acid transporter 1                               | Slc1a3   | 1     | Transport/cargo protein         |

Protein and gene names of synaptic cleft candidates are indicated, together with their Molecular Class (HPRD). Indicated is also how many biological replicates a protein was enriched (Replicates).

**Table S3.** Candidate excitatory synaptic cleft orphans.

| Protein                                              | Gene     | Repl. | Molecular Class                 |
|------------------------------------------------------|----------|-------|---------------------------------|
| CD166 antigen                                        | Alcam    | 4     | Adhesion molecule               |
| Adhesion G protein-coupled receptor L3/Latrophilin-3 | Adgrl3   | 4     | N.A.                            |
| Neogenin (Fragment)                                  | Neo1     | 3     | Cell surface receptor           |
| Gamma-enolase                                        | Eno2     | 2     | Enzyme: Hydratase               |
| Dipeptidyl aminopeptidase-like protein 6             | Dpp6     | 2     | Membrane transport protein      |
| Tenascin-R                                           | Tnr      | 2     | Extracellular matrix protein    |
| Leucine-rich glioma-inactivated protein 1            | Lgi1     | 2     | Unclassified                    |
| Ciliary neurotrophic factor receptor subunit alpha   | Cntfr    | 1     | Cell surface receptor           |
| Annexin A1                                           | Anxa1    | 1     | Calcium binding protein         |
| Sodium-driven chloride bicarbonate exchanger         | Slc4a10  | 1     | Membrane transport protein      |
| Plasminogen receptor (KT)                            | Plgrkt   | 1     | N.A.                            |
| Solute carrier family 12 member 5                    | Slc12a5  | 1     | Membrane transport protein      |
| V-type proton ATPase subunit C 1                     | Atp6v1c1 | 1     | ATPase                          |
| Amyloid-like protein 2                               | Ap1p2    | 1     | Integral membrane protein       |
| Profilin-1                                           | Pfn1     | 1     | Cytoskeletal associated protein |
| Coiled-coil domain-containing protein 80             | Ccdc80   | 1     | Unclassified                    |
| Prohibitin                                           | Phb      | 1     | Adapter molecule                |

Protein and gene names of synaptic cleft candidates are indicated, together with their Molecular Class (HPRD). Indicated is also how many biological replicates a protein was enriched (Replicates).

**Table S4.** GO terms used in post hoc in-silico filtering/data analysis.

| Cellular Component                                   |
|------------------------------------------------------|
| Golgi apparatus                                      |
| cell surface                                         |
| cytoplasm                                            |
| cytoskeleton                                         |
| endoplasmic reticulum                                |
| endosome                                             |
| extracellular matrix                                 |
| extracellular membrane-bounded organelle             |
| extracellular region                                 |
| extrinsic component of presynaptic membrane          |
| extrinsic component of spine apparatus membrane      |
| intracellular organelle                              |
| intracellular part                                   |
| intrinsic component of presynaptic membrane          |
| intrinsic component of spine apparatus membrane      |
| mitochondrion                                        |
| nucleus                                              |
| organelle membrane                                   |
| organelle part                                       |
| plasma membrane                                      |
| postsynapse                                          |
| postsynaptic density, intracellular component        |
| postsynaptic membrane                                |
| postsynaptic specialization                          |
| postsynaptic specialization membrane                 |
| postsynaptic specialization, intracellular component |
| presynapse                                           |
| presynaptic active zone                              |
| presynaptic active zone membrane                     |
| presynaptic cytosol                                  |
| presynaptic membrane                                 |
| ribosome                                             |
| spine apparatus                                      |
| spine apparatus membrane                             |
| synapse                                              |
| synapse part                                         |

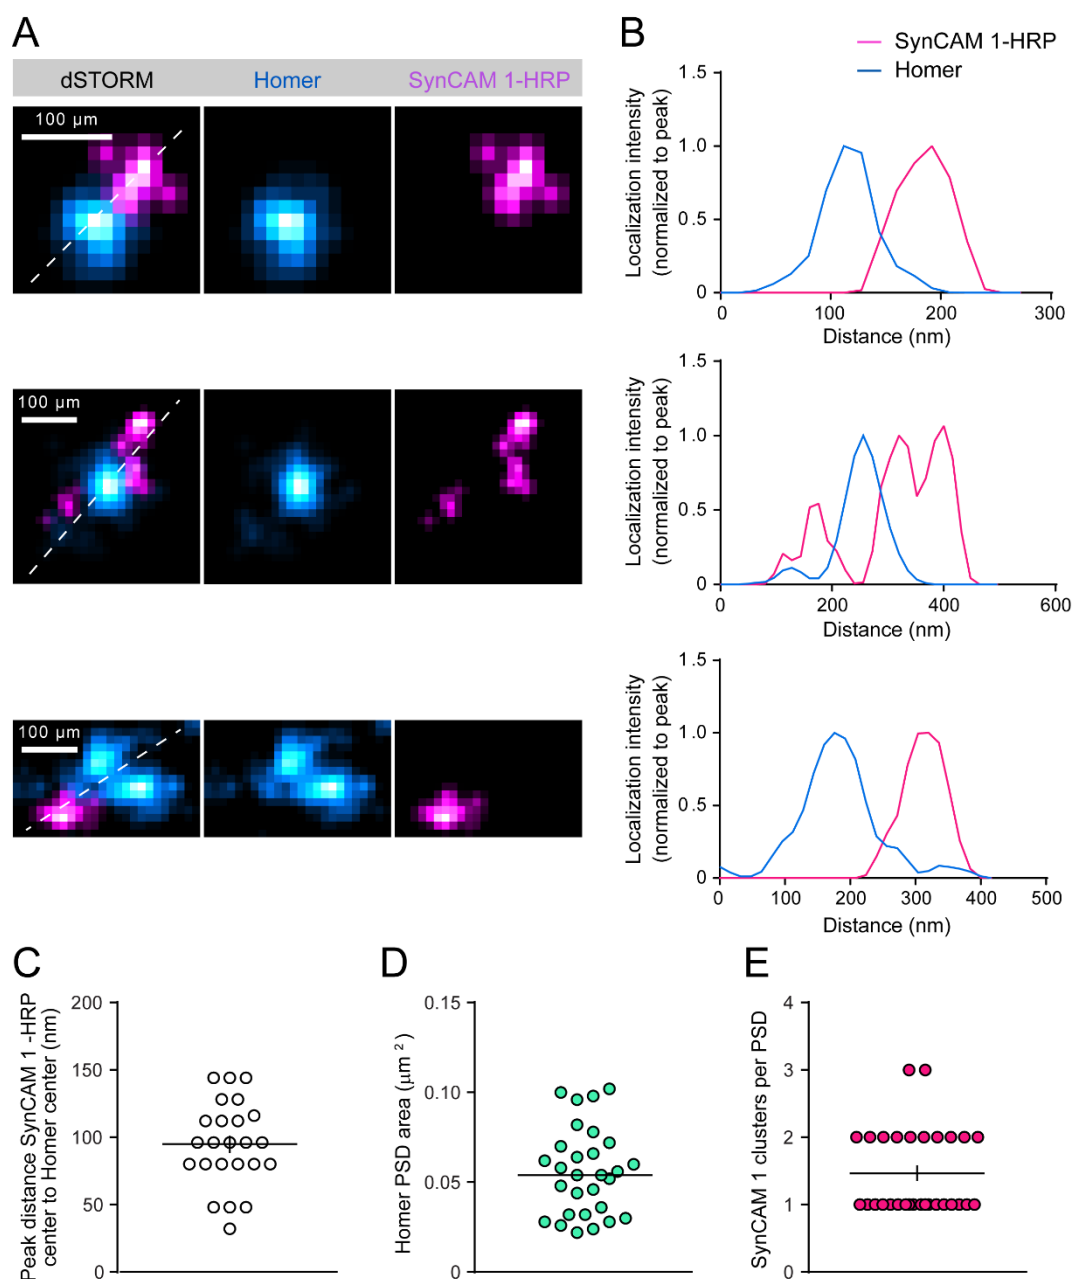

**Figure S1.** Characterization of super-resolved SynCAM 1-HRP and post-synaptic Homer. **(A)** Three examples of two-color dSTORM reconstruction of synapses from 21 days in vitro (div) rat hippocampal neurons surface-labeled by immunostaining with anti-FLAG antibodies against exogenous SynCAM 1-HRP containing the FLAG epitope (magenta) and the endogenous excitatory postsynaptic marker Homer (cyan). Diagonal line, line scan used for **(B)**. **(B)** Protein localization distribution perpendicular to the trans-synaptic axis. Densities were determined by dSTORM and normalized to the peak of each channel and measured over the distance shown in **A**. **(C)** Inter-cluster distance analysis between center of SynCAM 1-HRP and post-synaptic Homer clusters. **(D)** Post-synaptic density (PSD) area as measured by size of Homer clusters. **(E)** Number of SynCAM 1-HRP clusters per PSD (Homer).
